# Supplementary material
Source: publisher figshare collection journal article supplement (https://acs.figshare.com/ndownloader/files/14619509)
Supplement: Supplementary file 1 [file 14619509]

## Supporting information

### Valence Electron and Chemical State Analysis of Be<sub>12</sub>M (M = Ti, V) Beryllides by Soft X-ray Emission Spectroscopy

Keisuke Mukai,<sup>1</sup> Ryuta Kasada,<sup>2\*</sup> Kiyohiro Yabuuchi,<sup>1</sup> Satoshi Konishi,<sup>1</sup> Jae-Hwan Kim,  
<sup>3</sup> Masaru Nakamichi<sup>3</sup>

<sup>1</sup> Institute of Advanced Energy, Kyoto University, Gokasho, Uji, Kyoto 611-0011, Japan

<sup>2</sup> Institute for Material Research, Tohoku University, Sendai 980-8577, Japan

<sup>3</sup> Fusion Energy Research and Development Directorate, National Institutes for Quantum and Radiological Science and Technology, 2-166 Obuchi, Omotedate, Rokkasho, Aomori, 039-3212, Japan

\* Corresponding author: [r-kasada@imr.tohoku.ac.jp](mailto:r-kasada@imr.tohoku.ac.jp)

Table S1 Lattice parameters of Be, Be<sub>12</sub>Ti, Be<sub>12</sub>V, and BeO obtained by the structural optimization in the DFT calculations compared with the experimental ones.<sup>1-4</sup> The calculated lattice parameters agreed well with the experimental ones.

|                     | Calculation  |              | Experimental       |                    |
|---------------------|--------------|--------------|--------------------|--------------------|
|                     | <i>a</i> (Å) | <i>c</i> (Å) | <i>a</i> (Å)       | <i>c</i> (Å)       |
| Be                  | 2.257        | 3.587        | 2.287 <sup>a</sup> | 3.583 <sup>a</sup> |
| Be <sub>12</sub> Ti | 7.430        | 4.235        | 7.35 <sup>b</sup>  | 4.19 <sup>b</sup>  |
| Be <sub>12</sub> V  | 7.215        | 4.147        | 7.278 <sup>c</sup> | 4.212 <sup>c</sup> |
| BeO                 | 2.705        | 4.395        | 2.698 <sup>d</sup> | 4.378 <sup>d</sup> |

<sup>a</sup> Reference 1

<sup>b</sup> Reference 2

<sup>c</sup> Reference 3

<sup>d</sup> Reference 4

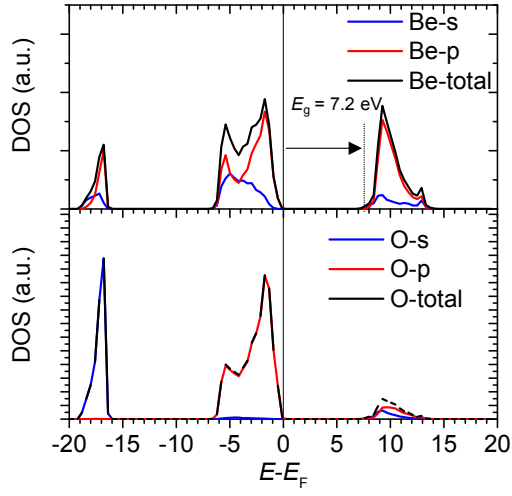

Fig. S1 Partial density of states (DOSs) of BeO plotted with the energy referenced to Fermi energy  $E_F$ . Black, blue, red, and green solid lines represent DOSs of total,  $s$ , and  $p$  states. The band gap energy of BeO was estimated to be 7.2 eV, which were comparable with the previous calculated values of 7.0 and 7.54 eV.<sup>5,6</sup> The calculated band gap was underestimated from the experimental band gap of BeO (10.6 eV).<sup>7</sup> The partial DOS Be-2 $p$  convoluted with the Gaussian function is compared with the experimental Be-K $\alpha$  spectrum from the BeO specimen in Fig. 6.

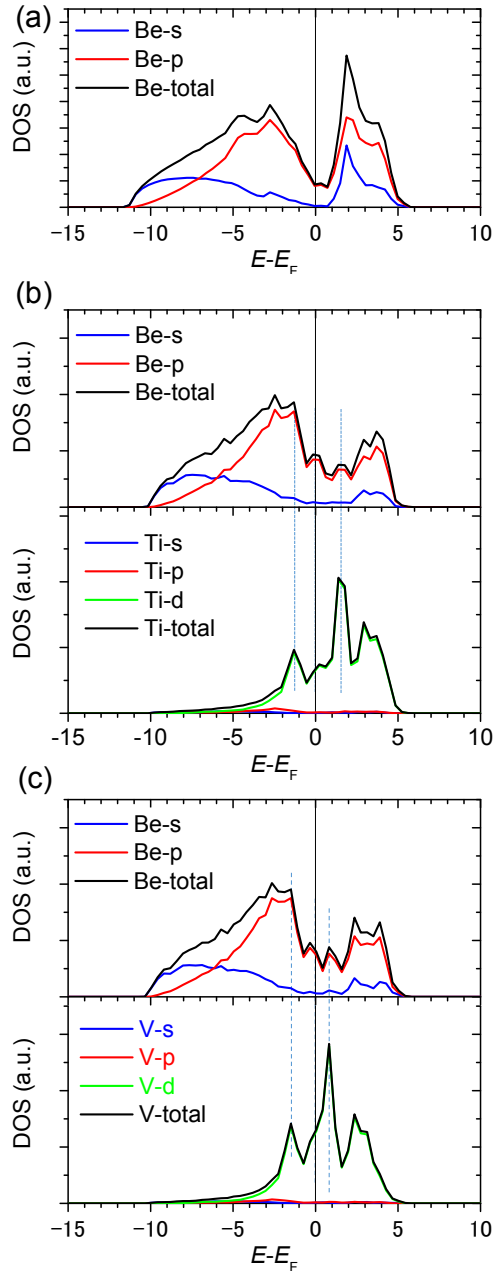

Fig. S2 Density of states in metallic Be (a),  $\text{Be}_{12}\text{Ti}$  (b), and  $\text{Be}_{12}\text{V}$  (c) with the energy referenced to the Fermi levels  $E_F$ . Black, blue, red, and green solid lines represent total,  $s$ ,  $p$ , and  $d$  states. The DOSs of Be with the energy referenced with the Be-1s centroid are shown in Fig. 3. The valence electron structure of Be in  $\text{Be}_{12}\text{Ti}$  and  $\text{Be}_{12}\text{V}$  were altered from that of Be in metallic Be. The hybridized peaks of O  $2p$  and Ti/V  $3d$  states shown by blue dashed lines near the Fermi levels ( $E - E_F = 0$ ) were seen in  $\text{Be}_{12}\text{Ti}$  and  $\text{Be}_{12}\text{V}$ .

## References

1. Schwarzenberger, D. R. Accurate determination of the lattice parameters of beryllium. *Philos. Mag.* **1959**, *4*, 1242–1246.
2. Gillam, E.; Rooksby, H. P.; Brownlee, L. D. Structural relationships in beryllium–titanium alloys. *Acta Crystallogr.* **1964**, *17*, 762–763.
3. Von Batchelder, F.W.; Raeuchle, R.F. The structure of a new series of  $MBe_{12}$  compounds. *Acta Crystallogr.* **1957**, *10*, 648–649.
4. Hazen, R. M.; Finger, L. W. High-pressure and high-temperature crystal chemistry of beryllium oxide. *J. Appl. Phys.* **1986**, *59*, 3728.
5. Chang, K.J.; Froyen, S.; Cohen, M. The electronic band structures for zincblende and wurtzite BeO. *J. Phys. C: Solid State Phys.* **1983**, *16*, 3475.
6. Xu, Y. N.; Ching, W. Y. Electronic, optical, and structural properties of some wurtzite crystals. *Phys. Rev. B*, **1993**, *48*, 4335.
7. Roessler, D. M.; Walker, W. C.; Loh, E. Electronic spectrum of crystalline beryllium oxide. *J. Phys. Chem. Solids* **1969**, *30*, 157–167.
